# Supplementary material for: Old Yellow Enzyme homologues in Mucor circinelloides: expression profile and biotransformation
Source: PubMed Central journal article supplement (PMC5608841; doi:10.1038/s41598-017-12545-7), 2017-09-21
Supplement: 41598_2017_12545_MOESM1_ESM.pdf [file 41598_2017_12545_MOESM1_ESM.pdf]

**Old Yellow Enzyme homologues in *Mucor circinelloides*: expression profile and biotransformation.**

Alice Romagnolo<sup>a</sup>, Federica Spina<sup>a</sup>, Anna Poli<sup>a</sup>, Sara Risso<sup>a</sup>, Bianca Serito<sup>a</sup>, Michele Crotti<sup>b</sup>, Daniela Monti<sup>c</sup>, Elisabetta Brenna<sup>b</sup>, Luisa Lanfranco<sup>a</sup> and Giovanna Cristina Varese<sup>a\*</sup>

**Supp. Fig. 1.** a) conserved domains for 9 *mcoyes*. b) Conserved domains for *mcoye10*.

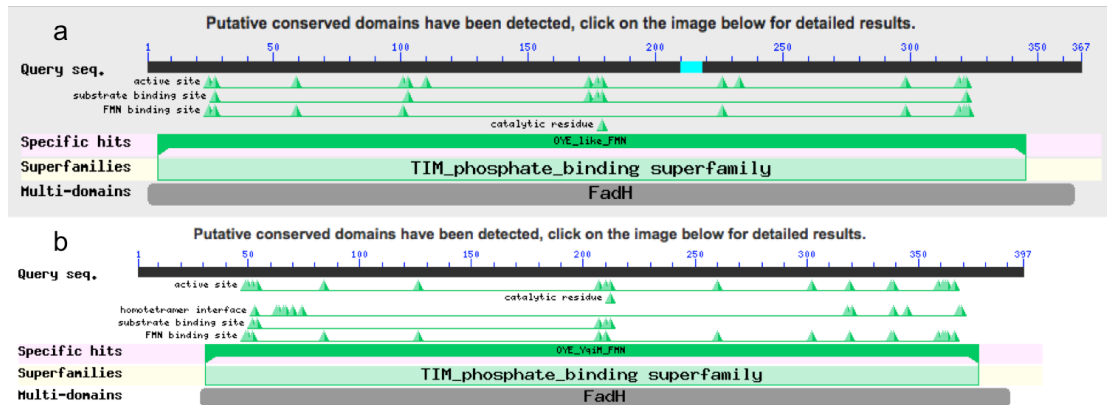

**Supp. Fig. 2.** PCR products obtained during specific primer validation; b: negative control (PCR mixture with no DNA templates). Molecular weight marker: GelPilot 1 kb Plus Ladder. Image acquired with Gel Doc XR, Biorad and processed with Quantity One software, Biorad.

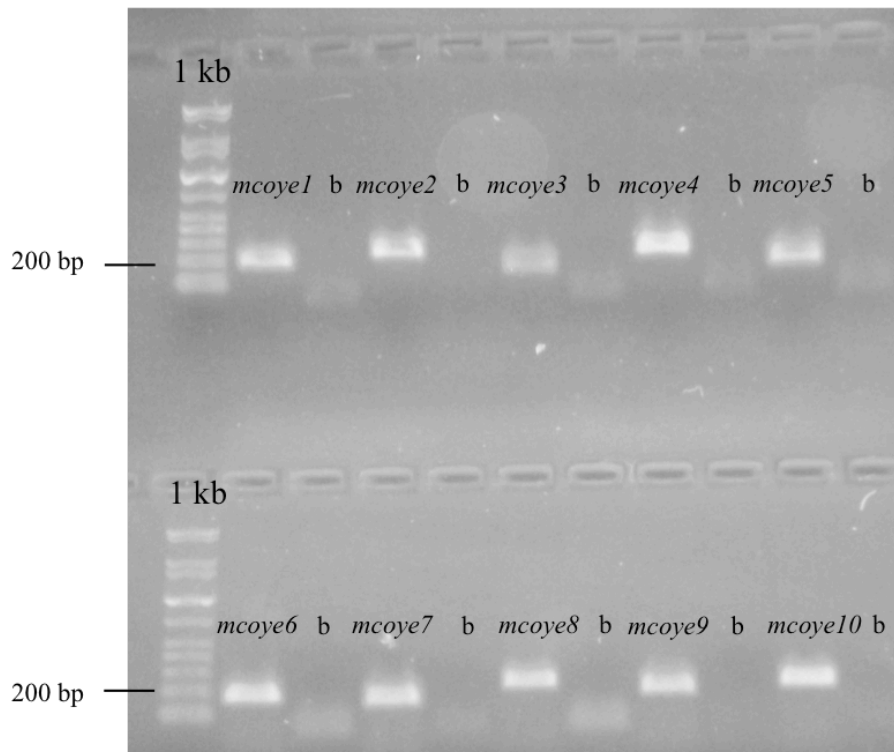

**Supp. Fig. 3.** qPCR report of three genes (*mcoye9*, *mcoye6* and *mcoye10*). The first three curves represent HK gene. All the genes represented in the graph are expressed after the HK gene.

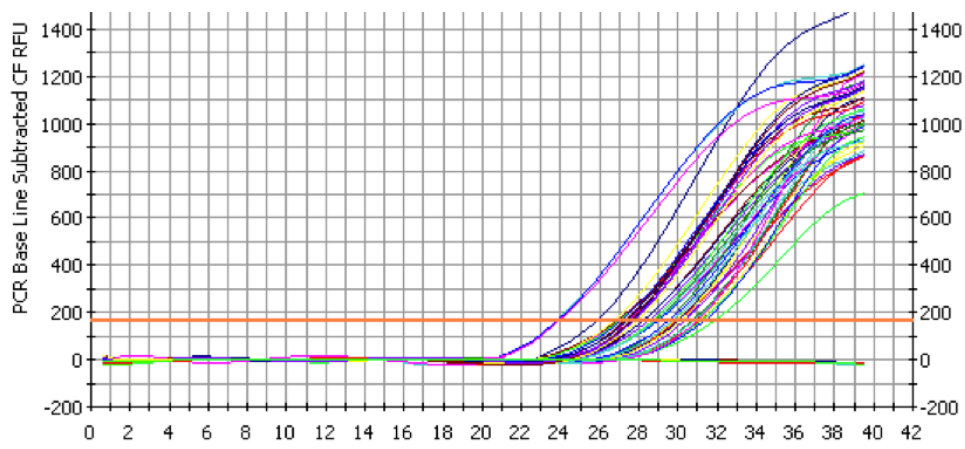

**Supp. Table 1.** List of specific primers for qRT-PCR of *M. circinelloides*.

| <b>Primers</b>      | <b>Sequences (5'-3')</b> | <b>Amplicon length</b> | <b>Annealing temperatures (°C)</b> |
|---------------------|--------------------------|------------------------|------------------------------------|
| <i>mcoye1</i><br>F  | TGCCAATGGTTATCTGGTCG     | 177                    | 60                                 |
| <i>mcoye1</i><br>R  | CTGGAAGCCGTTACCTGGA      |                        |                                    |
| <i>mcoye2</i><br>F  | TCGTGCCAACTTCTTCTTGC     | 223                    | 60                                 |
| <i>mcoye2</i><br>R  | GGTTCAATTCCCAGCCGTTG     |                        |                                    |
| <i>mcoye3</i><br>F  | GGCTACTTGACCTCAGAGCT     | 175                    | 60                                 |
| <i>mcoye3</i><br>R  | GAGTCAATGAAAGGCCACCA     |                        |                                    |
| <i>mcoye4</i><br>F  | AGCTACCTCGTGCTCTTACC     | 185                    | 56                                 |
| <i>mcoye4</i><br>R  | GGATGATCCGCCATAAATATCG   |                        |                                    |
| <i>mcoye5</i><br>F  | CTCAGGCCCTTCAAGACAGA     | 157                    | 60                                 |
| <i>mcoye5</i><br>R  | GTATCCACCGGCAGAGATGA     |                        |                                    |
| <i>mcoye6</i><br>F  | GGCGCTTTCATCTACTTGCA     | 206                    | 60                                 |
| <i>mcoye6</i><br>R  | CGCATTTAAGGCAGCTTGCA     |                        |                                    |
| <i>mcoye7</i><br>F  | TCCCTCCATCATTATCGCAAT    | 231                    | 56                                 |
| <i>mcoye7</i><br>R  | AATCAAGATACCCCACATCG     |                        |                                    |
| <i>mcoye8</i><br>F  | CTTCTCTCCTAATGGCTCAG     | 162                    | 56                                 |
| <i>mcoye8</i><br>R  | AATGGTGTTACCTTGCCAT      |                        |                                    |
| <i>mcoye9</i><br>F  | GTGCAAGATTTTCGCCAAGC     | 225                    | 60                                 |
| <i>mcoye9</i><br>R  | CTCGGATACCTGTTGCTCT      |                        |                                    |
| <i>mcoye10</i><br>F | AATCGGCGTGGATGTCATTG     | 189                    | 60                                 |
| <i>mcoye10</i><br>R | ATCAGCCTCGTCCTTTTCCA     |                        |                                    |

**Supp. Table 2.** Putative OYE homologues of the fungi belonging to the Mucormycotina with sequence ID (JGI database) and identity percentage with *S. pastorianus* OYE1.

| Species                                                         | Sequence ID | ID % with OYE1 |
|-----------------------------------------------------------------|-------------|----------------|
| <i>Backusella circina</i> FSU 941 v1.0                          | 239566      | 52.50          |
|                                                                 | 321291      | 52.30          |
|                                                                 | 288216      | 53.60          |
|                                                                 | 326062      | 53.40          |
|                                                                 | 258711      | 53.40          |
|                                                                 | 301550      | 49.30          |
|                                                                 | 320605      | 53.10          |
|                                                                 | 283228      | 49.60          |
|                                                                 | 282556      | 50.00          |
|                                                                 | 270152      | 51.90          |
| <i>Hesseltinella vesiculosa</i> NRRL3301 v2.0                   | 1409933     | 49.80          |
|                                                                 | 1344648     | 48.70          |
|                                                                 | 1389673     | 52.50          |
|                                                                 | 1407959     | 46.60          |
|                                                                 | 1276110     | 51.10          |
| <i>Lichtheimia hyalospora</i> v1.0                              | 204294      | 53.00          |
|                                                                 | 121608      | 53.30          |
|                                                                 | 230638      | 49.20          |
|                                                                 | 167093      | 37.70          |
| <i>Phycomyces blakesleeanus</i> NRRL1555 v2.0                   | 113057      | 52.60          |
|                                                                 | 24356       | 53.10          |
|                                                                 | 112394      | 52.20          |
|                                                                 | 146092      | 54.00          |
|                                                                 | 155499      | 50.60          |
|                                                                 | 133910      | 51.90          |
|                                                                 | 181382      | 51.50          |
|                                                                 | 168981      | 50.40          |
|                                                                 | 168987      | 50.40          |
| 168986                                                          | 50.00       |                |
| <i>Rhizopus microsporus</i> ATCC11559 v1.0                      | 229508      | 60.20          |
|                                                                 | 224787      | 51.90          |
|                                                                 | 193785      | 51.90          |
|                                                                 | 224132      | 48.70          |
|                                                                 | 226116      | 60.00          |
|                                                                 | 228303      | 39.00          |
|                                                                 | 171195      | 50.70          |
| <i>Rhizopus microsporus</i> var. <i>chinensis</i> CCTCC M201021 | 10823       | 55.10          |
|                                                                 | 7780        | 60.20          |
|                                                                 | 5247        | 59.80          |
|                                                                 | 11257       | 53.70          |
|                                                                 | 9553        | 53.10          |
|                                                                 | 15357       | 51.90          |
|                                                                 | 9473        | 52.50          |
|                                                                 | 2454        | 49.10          |

|                                                     |        |       |
|-----------------------------------------------------|--------|-------|
|                                                     | 579    | 48.70 |
|                                                     | 13117  | 39.00 |
|                                                     | 236210 | 59.50 |
|                                                     | 277442 | 54.00 |
|                                                     | 196704 | 52.30 |
|                                                     | 263891 | 52.70 |
| <i>Rhizopus microsporus</i> var. <i>microsporus</i> | 233319 | 51.30 |
| ATCC52813 v1.0                                      | 210812 | 51.30 |
|                                                     | 220486 | 48.70 |
|                                                     | 231713 | 48.00 |
|                                                     | 198995 | 39.10 |
|                                                     | 294582 | 50.70 |
|                                                     | 1405   | 59.50 |
|                                                     | 226692 | 54.00 |
|                                                     | 234533 | 52.70 |
|                                                     | 221217 | 51.30 |
| <i>Rhizopus microsporus</i> var. <i>microsporus</i> | 20582  | 48.70 |
| ATCC52814 v1.0                                      | 338611 | 51.90 |
|                                                     | 323344 | 45.60 |
|                                                     | 278916 | 50.70 |
|                                                     | 209982 | 57.10 |
|                                                     | 301704 | 49.10 |
|                                                     | 11141  | 53.30 |
|                                                     | 13469  | 53.20 |
|                                                     | 13470  | 54.10 |
|                                                     | 1911   | 52.90 |
| <i>Rhizopus oryzae</i> 99-880                       | 13455  | 52.70 |
|                                                     | 16652  | 52.40 |
|                                                     | 16660  | 52.90 |
|                                                     | 5596   | 36.20 |
|                                                     | 16962  | 34.90 |
|                                                     | 16961  | 34.90 |
|                                                     | 167996 | 50.20 |
|                                                     | 296378 | 51.30 |
| <i>Umbelopsis ramanniana</i> AG v1.0                | 238239 | 52.10 |
|                                                     | 228649 | 33.70 |
|                                                     | 228848 | 44.20 |
|                                                     | 263903 | 44.30 |

### *Biomass dry weight, pH and reducing sugars*

The dry weight of fungal biomasses did not change significantly throughout the biotransformation of CE and MCA and did not reveal any remarkable difference between the condition with the substrate and the control either. In the condition without MCI, the biomass remained stable during the whole experiment while, by contrast, after 4 d of MCI exposure there was a slight inhibition of fungal growth (- 30 %).

In all cultural conditions, the pH was acidic (CE: 3.8-4.2, MCA: 4.2-4.7, MCI: 4.1-4.8) and did not display any significant variation throughout the experiments.

The consumption of reducing sugars followed a similar trend for the three substrates; the fungus used most of the glucose (80 %) during the pre-growth phase leaving at the end of the assay, less than 5 %. The consumption profiles in presence and absence of the substrates were similar.
